# Supplementary material for: The genetic landscape of metaplastic breast cancers and uterine carcinosarcomas
Source: PubMed Central journal article supplement (PMC8024717; doi:10.1002/1878-0261.12813), 2021-02-19
Supplement: MOL2-15-1024-s001.pdf [file MOL2-15-1024-s001.pdf]

## **SUPPLEMENTARY MATERIALS**

### **The Genetic Landscape of Metaplastic Breast Cancers and Uterine Carcinosarcomas**

Moukarzel et al.

Supplementary Methods

Supplementary Figures S1-S3

Supplementary Tables S1-S5

## **SUPPLEMENTARY METHODS**

### **Whole-exome sequencing analysis**

DNA samples from each the histologically distinct components of each of the 11 metaplastic breast cancers (MBCs) and six uterine carcinosarcomas (UCSs) and their respective normal samples were subjected to whole-exome sequencing (WES) at MSKCC's Integrated Genomics Operation (IGO) following validated protocols (1,2). Sequencing data of the separately microdissected components, as well as of the 35 bulk MBCs (Ng et al, 2017)(3) and 57 UCSs (The Cancer Genome Atlas, TCGA)(4) were analyzed as previously described (1,2). In brief, somatic single nucleotide variants (SNVs) were identified using MuTect (v.1.1.4) (5), and small insertions and deletions (indels) were detected using a combination of callers (i.e. VarScan2 (v2.3.6)(6), Strelka (v3.1.1)(7), Lancet (8), Platypus (9) and Scalpel (10)) as previously described (1). SNVs and indels outside the intersection of the two WES capture designs (i.e. Ng et al (3) and TCGA (4)) were filtered out, as were SNVs and indels for which the variant allele fraction (VAF) in the tumor sample was <5 times the VAF of the paired normal tissue, SNVs and indels found at >5% global minor allele frequency of dbSNP (build 146) or found at >1% global allele frequency in ExAC or gnomAD (11), as previously described (1,12).

### **Fraction of the genome altered**

Allele specific copy number aberrations (CNAs), tumor purity and ploidy were obtained from the WES data using FACETS (13). The fraction of the genome altered was computed from the CNAs obtained from FACETS. Segments with an absolute copy number above or below the integer ploidy or were affected by copy neutral loss of heterozygosity were considered altered. The footprint of genome covered by these segments was reported as a function of the total footprint of genome covered by the WES capture design, as described (12).

### **Clonal relatedness**

To infer the clonal relatedness between the histologically distinct components of each MBC and UCS, we defined the "clonality index" (CI) as the probability of two lesions sharing mutations not expected to have co-occurred by chance based on a previously validated method (14,15). Briefly, all somatic mutations were included and at least one non-synonymous mutation was required to be shared in two samples being compared. Given that this analysis is potentially confounded by the presence of highly recurrent somatic mutations, the CI provides an adjustment for the presence and frequency of a given somatic mutation, including synonymous and non-synonymous, in the triple-negative breast cancer (TNBC) dataset from TCGA (n=123)(16), given that all MBCs included in this study were TNBCs, the 35 MBCs from Ng et al. (3), and the 57 UCSs retrieved from TCGA (4).

Adopting previous approach (14,15), we defined  $CI = -\log_{10} \prod_{m=1}^M P(X)_m$ . Given the repertoire of mutations of two samples, the probability of observing a given mutation in both samples is defined by the binomial probability  $P(X) = C_n^k p^k (1-p)^{n-k}$ ,  $n=2$ ,  $k=2$ , where  $p$  is the frequency of a given mutation in the combined 158 TNBCs and MBCs for the analysis of the 11 multicomponent MBCs, or the 55 non-hypermutated UCSs cases from TCGA for the analysis of the 6 multicomponent UCSs, and  $n$  is the number of shared mutations between a pair of lesions or the average number of mutations found in the two samples in the target regions divided by the size of the target regions. Thus, the probability of observing a given set of  $M$  identical mutations in the two samples is given by  $\prod_{m=1}^M P(X)_m$ . To objectively define a cut-off for clonal relatedness among the MBC cases, we used the mutational data from the 123 TNBCs from TCGA (16) and the 35 MBCs from Ng et al. (3). As the positive control (i.e. clonally related), we randomly selected 40%, 60% and 80% of the set of mutations from the 158 unrelated cases in duplicate to simulate heterogeneity between biologically related samples. As the negative control (i.e. unrelated), we randomly selected an equivalent number of pairs (i.e.  $3 \times 158 = 474$ ) of unrelated cases from TCGA. To define the optimum cut-offs, the R package 'ROCR' was used to maximize accuracy. To avoid over-fitting of data, the above procedures were repeated 100 times to define the median and 95% confidence interval of the optimum cut-off. The median optimum cut-off was 18.78 (95% confidence interval 18.71-18.86), the median accuracy was 82.3% (95% confidence interval 80.1%-83.8%), the median sensitivity was 78.9% (95% confidence interval 75.9%-81.9%), and the median specificity was 85.7% (95% confidence interval 85.3%-86.0%).

A similar analysis was performed to define a cut-off for clonal relatedness among the UCS cases, using the mutational data from the 55 non-hypermutated UCSs from TCGA (4). The median optimum cut-off was 15.3 (95% confidence interval 15.0-15.6), the median accuracy was 93.1% (95% confidence interval 91.9%-94.4%), the median sensitivity was 89.1% (95% confidence interval 86.8%-91.4%), and the median specificity was 97.1% (95% confidence interval 96.7%-97.6%).

### Supplementary References

1. Pareja F, Brandes AH, Basili T, Selenica P, Geyer FC, Fan D, et al. Loss-of-function mutations in ATP6AP1 and ATP6AP2 in granular cell tumors. *Nat Commun.* 2018;9:3533.
2. Geyer FC, Li A, Papanastasiou AD, Smith A, Selenica P, Burke KA, et al. Recurrent hotspot mutations in HRAS Q61 and PI3K-AKT pathway genes as drivers of breast adenomyoepitheliomas. *Nat Commun.* 2018;9:1816.
3. Ng CKY, Piscuoglio S, Geyer FC, Burke KA, Pareja F, Eberle CA, et al. The Landscape of Somatic Genetic Alterations in Metaplastic Breast Carcinomas. *Clin Cancer Res.* 2017;23:3859-70.

4. Cherniack AD, Shen H, Walter V, Stewart C, Murray BA, Bowlby R, et al. Integrated Molecular Characterization of Uterine Carcinosarcoma. *Cancer Cell*. 2017;31:411-23.
5. Cibulskis K, Lawrence MS, Carter SL, Sivachenko A, Jaffe D, Sougnez C, et al. Sensitive detection of somatic point mutations in impure and heterogeneous cancer samples. *Nat Biotechnol*. 2013;31:213-9.
6. Koboldt DC, Zhang Q, Larson DE, Shen D, McLellan MD, Lin L, et al. VarScan 2: somatic mutation and copy number alteration discovery in cancer by exome sequencing. *Genome Res*. 2012;22:568-76.
7. Saunders CT, Wong WS, Swamy S, Becq J, Murray LJ, Cheetham RK. Strelka: accurate somatic small-variant calling from sequenced tumor-normal sample pairs. *Bioinformatics*. 2012;28:1811-7.
8. Narzisi G, Corvelo A, Arora K, Bergmann EA, Shah M, Musunuri R, et al. Genome-wide somatic variant calling using localized colored de Bruijn graphs. *Commun Biol*. 2018;1:20.
9. Rimmer A, Phan H, Mathieson I, Iqbal Z, Twigg SRF, Consortium WGS, et al. Integrating mapping-, assembly- and haplotype-based approaches for calling variants in clinical sequencing applications. *Nat Genet*. 2014;46:912-8.
10. Fang H, Bergmann EA, Arora K, Vacic V, Zody MC, Iossifov I, et al. Indel variant analysis of short-read sequencing data with Scalpel. *Nat Protoc*. 2016;11:2529-48.
11. Lek M, Karczewski KJ, Minikel EV, Samocha KE, Banks E, Fennell T, et al. Analysis of protein-coding genetic variation in 60,706 humans. *Nature*. 2016;536:285-91.
12. Weigelt B, Bi R, Kumar R, Bleuca P, Mandelker DL, Geyer FC, et al. The Landscape of Somatic Genetic Alterations in Breast Cancers From ATM Germline Mutation Carriers. *J Natl Cancer Inst*. 2018;110:1030-4.
13. Shen R, Seshan VE. FACETS: allele-specific copy number and clonal heterogeneity analysis tool for high-throughput DNA sequencing. *Nucleic Acids Res*. 2016;44:e131.
14. Schultheis AM, Ng CK, De Filippo MR, Piscuoglio S, Macedo GS, Gatus S, et al. Massively Parallel Sequencing-Based Clonality Analysis of Synchronous Endometrioid Endometrial and Ovarian Carcinomas. *J Natl Cancer Inst*. 2016;108:djv427.
15. Lee JY, Schizas M, Geyer FC, Selenica P, Piscuoglio S, Sakr RA, et al. Lobular Carcinomas In Situ Display Intralesion Genetic Heterogeneity and Clonal Evolution in the Progression to Invasive Lobular Carcinoma. *Clin Cancer Res*. 2019;25:674-86.
16. Ciriello G, Gatza ML, Beck AH, Wilkerson MD, Rhie SK, Pastore A, et al. Comprehensive Molecular Portraits of Invasive Lobular Breast Cancer. *Cell*. 2015;163:506-19.

## Supplementary Figure S1

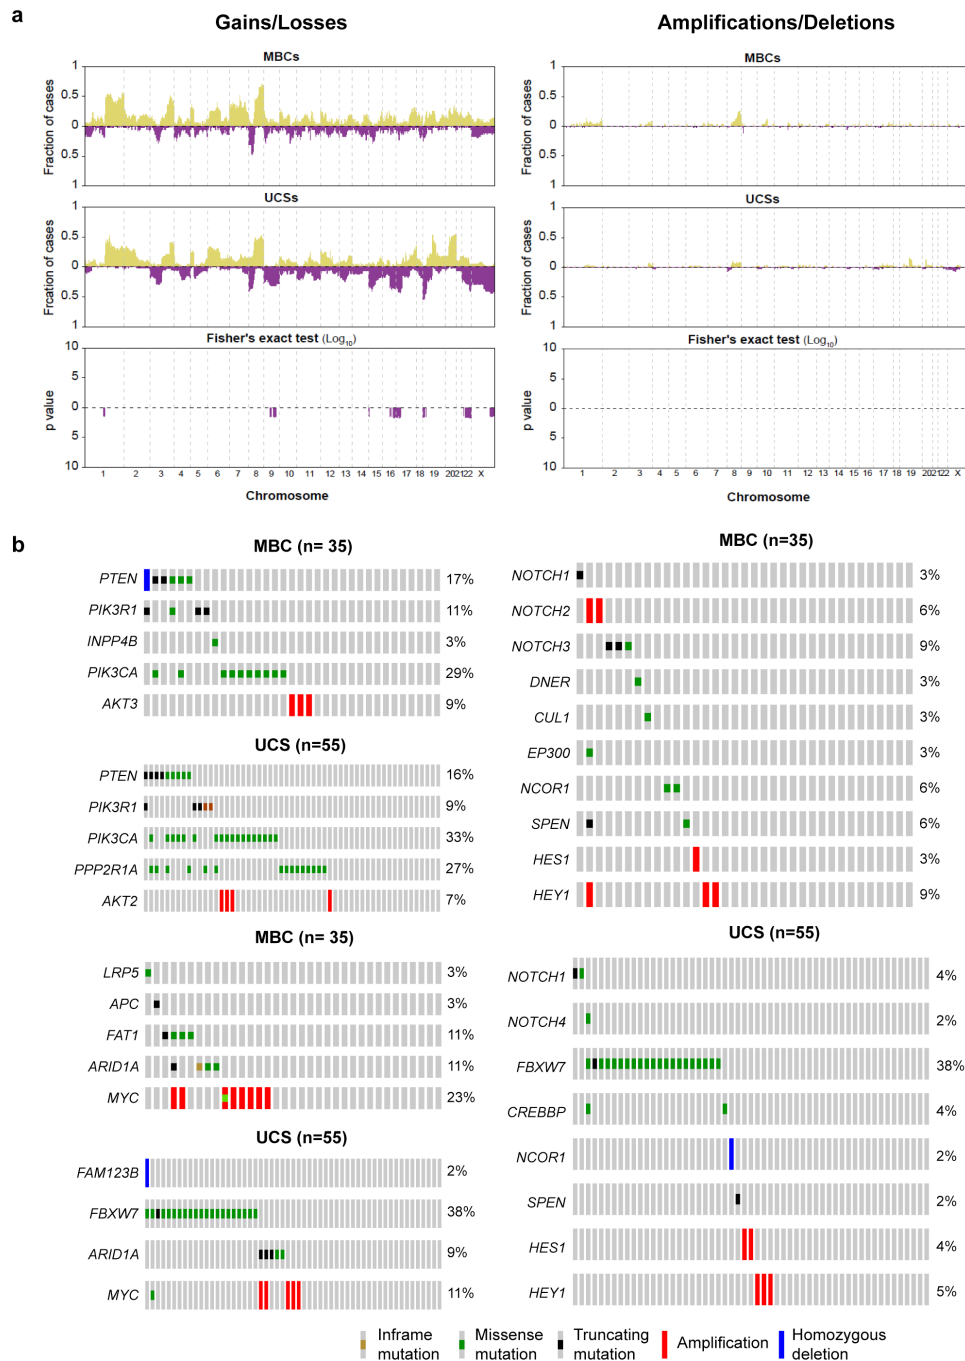

**Supplementary Figure S1. Copy number alterations and somatic mutations affecting selected signaling pathways in metaplastic breast cancers and uterine carcinosarcomas. (a)** Comparisons of the frequencies of copy number alterations (gains and losses, left; amplifications and homozygous deletions, right) metaplastic breast cancers (MBCs, n=35, top) and uterine carcinosarcomas (UCSs, n=55, middle). Fisher's exact test is shown in the bottom. **(b)** Genetic alterations in key pathways. Oncoprint of altered genes of the canonical PI3K/AKT/mTOR, Wnt and Notch pathways in metaplastic breast cancers (MBC, n=35) and uterine carcinosarcomas (UCSs, n=55). Cases are shown in columns and genes in rows. Somatic mutations and copy number alterations are color-coded according to the legend.

## Supplementary Figure S2

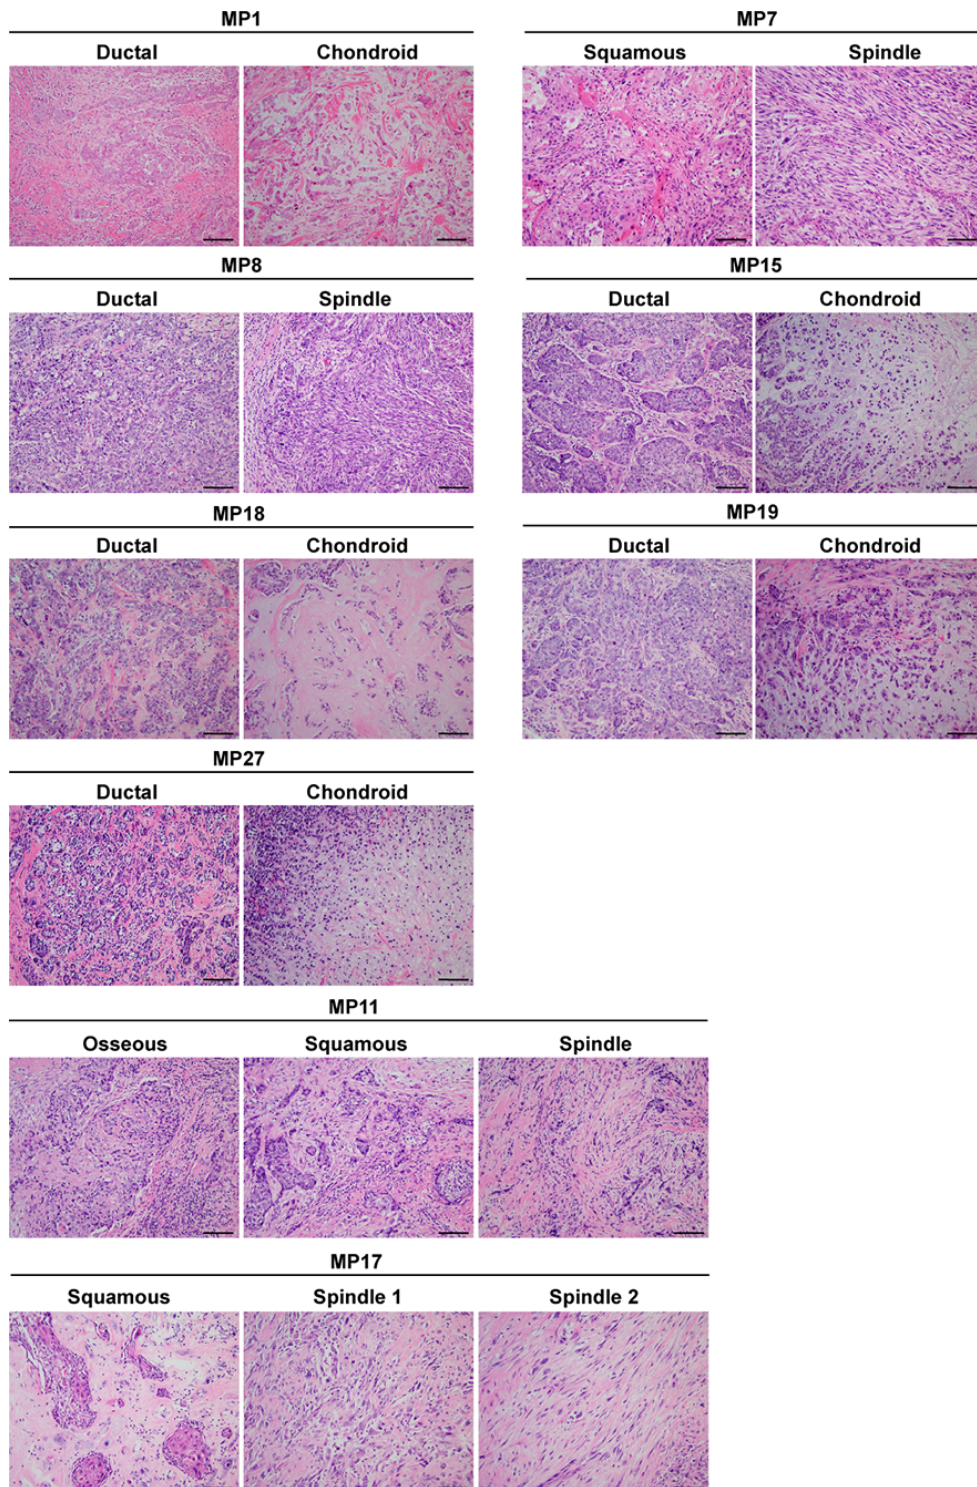

**Supplementary Figure S2. Representative micrographs of the histologic components of the metaplastic breast cancers subjected to bulk whole-exome sequencing as well as to whole-exome sequencing of the distinct microdissected components. Please note that for MP21 micrographs were not available.**

## Supplementary Figure S3

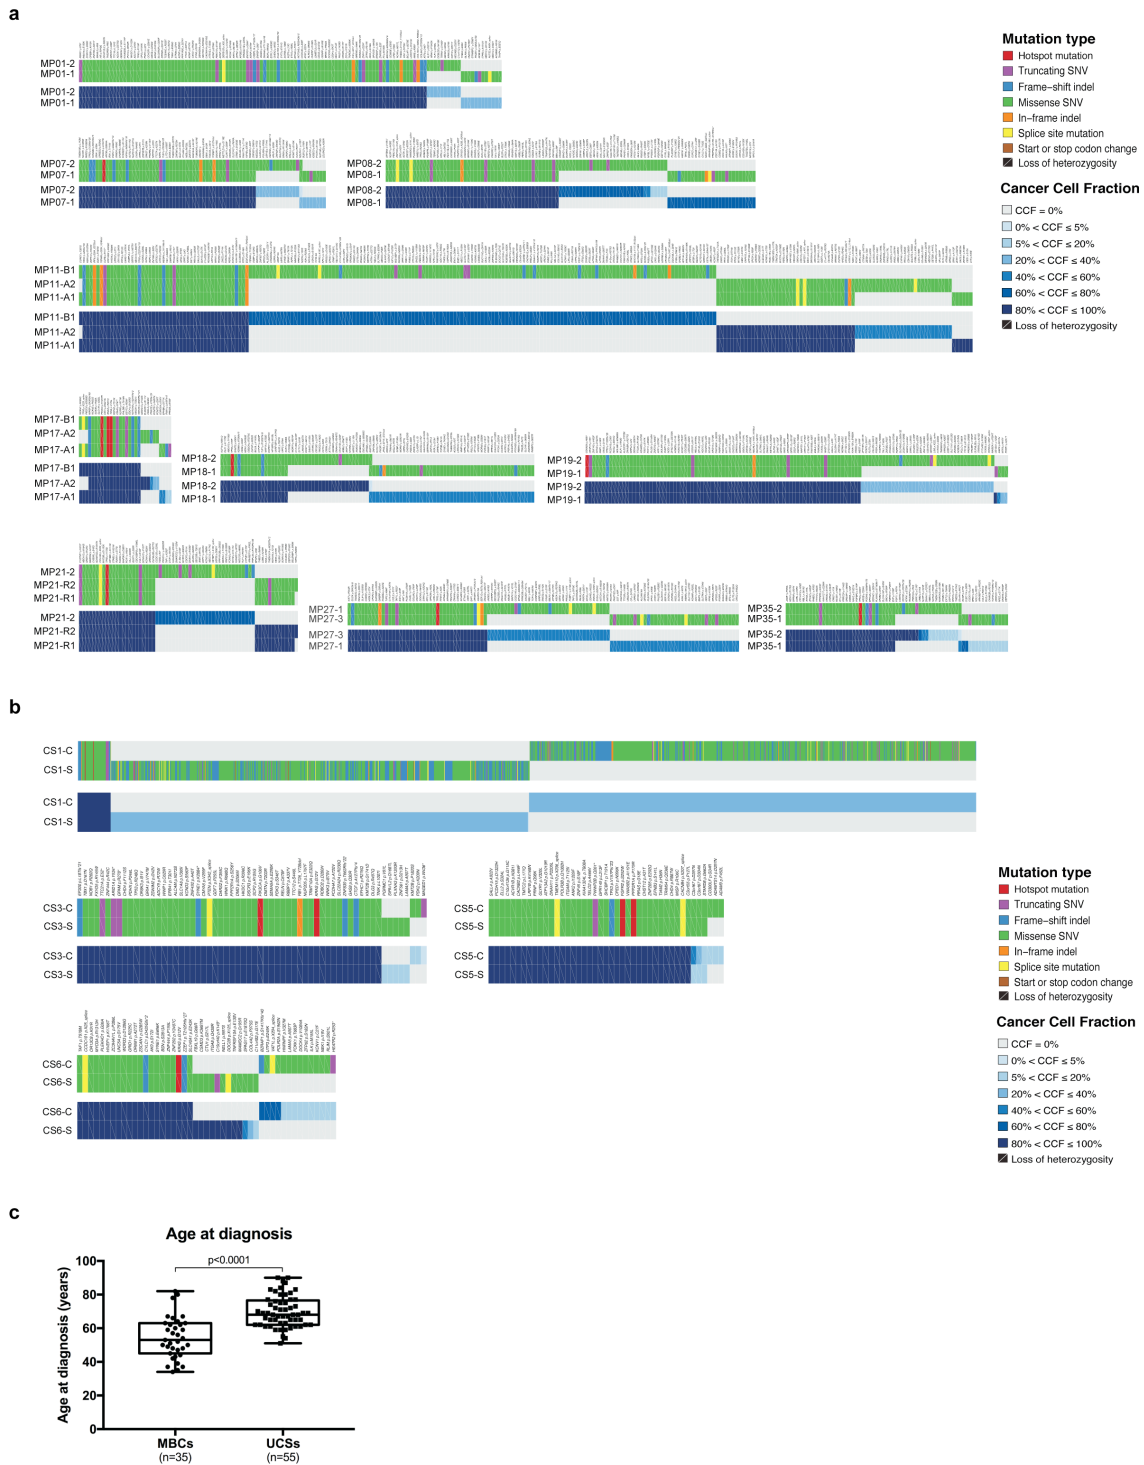

**Supplementary Figure S3. Clonal decomposition of the epithelial and mesenchymal components of the metaplastic breast carcinomas and uterine carcinosarcomas.** Clonal frequency heatmaps of mutations in the epithelial and mesenchymal histologic components of (a) MP1, MP7, MP8, MP11, MP17, MP18, MP19, MP21, MP27, MP35 and of (b) CS1, CS3, CS5, and CS6. Mutations are shown grouped by their clonal structure as inferred by PyClone. (c) Age at diagnosis of patients with metaplastic breast cancer (MBC, median 53 years, range 34-82, n=35) and with uterine carcinosarcoma (UCS, median 68 years, range 51-90, n=55). Mann-Whitney *U* test.



**Supplementary Table S1.** Clinico-pathologic information of the 35 metaplastic breast cancers re-analyzed from Ng et al (Clin Cancer Res 2017), 57 uterine carcinosarcomas from Cherniack et al (TCGA, Cancer Cell 2017), 11 metaplastic breast cancers with separately analyzed histologic components (this study), and 6 uterine carcinosarcomas with separately analyzed histologic components (this study).

| METAPLASTIC BREAST CANCERS (BULK WHOLE-EXOME SEQUENCING) |                                     |                  |                           |                   |                          |    |      |                           |                          |                 |          |          |
|----------------------------------------------------------|-------------------------------------|------------------|---------------------------|-------------------|--------------------------|----|------|---------------------------|--------------------------|-----------------|----------|----------|
| Sample ID                                                | Diagnosis                           | Matrix producing | Predominant Cellular Type | Histologic grade* | ER**                     | PR | HER2 | Triple-negative phenotype | Age at diagnosis (years) | Tumor size (cm) | pT stage | pN stage |
| META31                                                   | Carcinoma with mesenchymal elements | Yes              | Chondroid                 | 2                 | -                        | -  | -    | Yes                       | 59                       | 1.2             | T1c      | N0       |
| META30                                                   | Carcinoma with mesenchymal elements | No               | Chondroid                 | 3                 | -                        | -  | -    | Yes                       | 44                       | 0.7             | T1b      | N0       |
| META39                                                   | Carcinoma with mesenchymal elements | No               | Spindle                   | 3                 | -                        | -  | -    | Yes                       | 45                       | 5.5             | T3       | N0       |
| MP140                                                    | Spindle cell carcinoma              | No               | Squamous                  | 3                 | -                        | -  | -    | Yes                       | 42                       | 4               | T2       | N0       |
| META42                                                   | Carcinoma with squamous metaplasia  | No               | Squamous                  | 3                 | -                        | -  | -    | Yes                       | 48                       | 3.1             | T2       | N0       |
| META52                                                   | Carcinoma with mesenchymal elements | No               | Chondroid                 | 3                 | -                        | -  | -    | Yes                       | 59                       | 3.3             | T2       | N0       |
| META45                                                   | Carcinoma with mesenchymal elements | Yes              | Chondroid                 | 3                 | -                        | -  | -    | Yes                       | 50                       | 9               | T3       | N1b      |
| META57                                                   | Spindle cell carcinoma              | No               | Spindle                   | 3                 | -                        | -  | -    | Yes                       | 56                       | 2.3             | T2       | N0       |
| META61                                                   | Spindle cell carcinoma              | No               | Spindle                   | 2                 | -                        | -  | -    | Yes                       | 67                       | 1.8             | T1c      | N1m      |
| MP1                                                      | Carcinoma with mesenchymal elements | Yes              | Chondroid                 | 3                 | -                        | -  | -    | Yes                       | 26                       | 1.4             | T1c      | N0       |
| MP11                                                     | Carcinoma with squamous metaplasia  | No               | Squamous                  | 3                 | -                        | -  | -    | Yes                       | 37                       | 2.2             | T2       | N0       |
| MP15                                                     | Carcinoma with mesenchymal elements | Yes              | Chondroid                 | 3                 | -                        | -  | -    | Yes                       | 63                       | 2.3             | T2       | N1m      |
| MP17                                                     | Spindle cell carcinoma              | No               | Spindle                   | 3                 | -                        | -  | -    | Yes                       | 66                       | 1.4             | T3       | N1a      |
| MP18                                                     | Carcinoma with mesenchymal elements | Yes              | Chondroid                 | 3                 | -                        | -  | -    | Yes                       | 39                       | 1.7             | T1c      | N0       |
| MP19                                                     | Carcinoma with mesenchymal elements | Yes              | Spindle                   | 3                 | -                        | -  | -    | Yes                       | 62                       | 1.3             | T1c      | N0       |
| MP21                                                     | Spindle cell carcinoma              | No               | Spindle                   | 3                 | -                        | -  | -    | Yes                       | 37                       | 2.4             | T2       | N0       |
| MP27                                                     | Carcinoma with mesenchymal elements | Yes              | Chondroid                 | 3                 | -                        | -  | -    | Yes                       | 67                       | 1.1             | T1c      | N0       |
| MP7                                                      | Spindle cell carcinoma              | No               | Spindle                   | 3                 | -                        | -  | -    | Yes                       | 51                       | 2.5             | T2       | N0       |
| MP8                                                      | Spindle cell carcinoma              | No               | Spindle                   | 3                 | -                        | -  | -    | Yes                       | 34                       | 2.9             | T2       | N0       |
| MTC01                                                    | Spindle cell carcinoma              | No               | Spindle                   | 3                 | -                        | -  | -    | Yes                       | 67                       | 3.6             | T2       | N0       |
| MTC03                                                    | Spindle cell carcinoma              | No               | Spindle                   | 3                 | -                        | -  | -    | Yes                       | 43                       | 3.2             | T2       | N0       |
| MTC04                                                    | Carcinoma with mesenchymal elements | Yes              | Chondroid                 | 3                 | -                        | -  | -    | Yes                       | 48                       | 2.3             | T2       | N0       |
| MTC05                                                    | Carcinoma with mesenchymal elements | Yes              | Chondroid                 | 2                 | -                        | -  | -    | Yes                       | 49                       | 1.1             | T1b      | N0       |
| MTC07                                                    | Carcinoma with mesenchymal elements | Yes              | Chondroid                 | 3                 | -                        | -  | -    | Yes                       | 60                       | 2.2             | T2       | N0       |
| MTC10                                                    | Carcinoma with mesenchymal elements | No               | Chondroid                 | 3                 | -                        | -  | -    | Yes                       | 63                       | 4               | T2       | N0       |
| MTC12                                                    | Carcinoma with squamous metaplasia  | No               | Squamous                  | 2                 | -                        | -  | -    | Yes                       | 62                       | 3.5             | T2       | N0       |
| MTC13                                                    | Carcinoma with mesenchymal elements | Yes              | Chondroid                 | 2                 | -                        | -  | -    | Yes                       | 47                       | 4               | T2       | N0       |
| MTC14                                                    | Carcinoma with mesenchymal elements | Yes              | Spindle                   | 3                 | -                        | -  | -    | Yes                       | 67                       | 3.1             | T2       | N0       |
| MTC19                                                    | Spindle cell carcinoma              | No               | Spindle                   | 3                 | -                        | -  | -    | Yes                       | 60                       | 5               | T2       | N0       |
| MTC16                                                    | Carcinoma with squamous metaplasia  | No               | Squamous                  | 3                 | -                        | -  | -    | Yes                       | 44                       | 2               | T2       | N0       |
| MTC17                                                    | Carcinoma with squamous metaplasia  | No               | Squamous                  | 3                 | -                        | -  | -    | Yes                       | 52                       | 7.5             | T3       | N2       |
| MTC18                                                    | Carcinoma with squamous metaplasia  | No               | Squamous                  | 3                 | + (1% weak) + (20% weak) | -  | -    | No                        | 62                       | 5.2             | T3       | N0       |
| MTC19                                                    | Carcinoma with mesenchymal elements | Yes              | Chondroid                 | 3                 | -                        | -  | -    | Yes                       | 64                       | 3               | T2       | N0       |
| MTC20                                                    | Carcinoma with squamous metaplasia  | No               | Squamous                  | 3                 | -                        | -  | -    | Yes                       | 78                       | 3               | T2       | N0       |
| MTC23                                                    | Carcinoma with squamous metaplasia  | No               | Squamous                  | 3                 | -                        | -  | -    | No                        | 49                       | 12              | T3       | N2       |

| UTERINE CARCINOSARCOMAS (BULK WHOLE-EXOME SEQUENCING) |                                                  |                |                          |                    |                      |            |                  |                              |                      |                            |                                   |                           |
|-------------------------------------------------------|--------------------------------------------------|----------------|--------------------------|--------------------|----------------------|------------|------------------|------------------------------|----------------------|----------------------------|-----------------------------------|---------------------------|
| Sample ID                                             | Histological Type                                | Clinical Stage | Age at diagnosis (years) | Frozen Sarcoma (%) | Frozen Carcinoma (%) | Serous (%) | Endometrioid (%) | Undifferentiated Sarcoma (%) | L leiomyosarcoma (%) | Heterologous cartilage (%) | Heterologous rhabdomyosarcoma (%) | Histologic classification |
| TCGA-NS-A49B                                          | Uterine Carcinosarcoma (MMMT, Heterologous Type) | Stage IA       | 65                       | N/A                | N/A                  | 0          | 15               | 25                           | 0                    | 0                          | 0                                 | Serous-like               |
| TCGA-NS-A49A                                          | Uterine Carcinosarcoma (MMMT, Heterologous Type) | Stage IIC2     | 63                       | 98                 | 2                    | 5          | 0                | 0                            | 0                    | 0                          | 0                                 | Serous-like               |
| TCGA-NS-A49D                                          | Uterine Carcinosarcoma (MMMT, Heterologous Type) | Stage IIA      | 68                       | 98                 | 2                    | 0          | 0                | 0                            | 0                    | 0                          | 0                                 | Serous-like               |
| TCGA-NS-A49E                                          | Uterine Carcinosarcoma (MMMT, Heterologous Type) | Stage IA       | 68                       | 98                 | 2                    | 0          | 40               | 0                            | 0                    | 0                          | 0                                 | Endometrioid-like         |
| TCGA-NS-A49J                                          | Uterine Carcinosarcoma (MMMT, Heterologous Type) | Stage IIB      | 61                       | 70                 | 30                   | 40         | 0                | 60                           | 0                    | 0                          | 0                                 | Serous-like               |
| TCGA-NS-A49M                                          | Uterine Carcinosarcoma (MMMT, Heterologous Type) | Stage IIB      | 62                       | 62                 | 38                   | 0          | 20               | 60                           | 0                    | 0                          | 0                                 | Serous-like               |
| TCGA-NS-A49N                                          | Uterine Carcinosarcoma (MMMT, Heterologous Type) | Stage IIB      | 71                       | 40                 | 60                   | 0          | 30               | 70                           | 0                    | 0                          | 0                                 | Serous-like               |
| TCGA-NS-A49Z                                          | Uterine Carcinosarcoma (MMMT, Heterologous Type) | Stage IIC2     | 67                       | 90                 | 10                   | 50         | 0                | 50                           | 0                    | 0                          | 0                                 | Serous-like               |
| TCGA-NS-A49S                                          | Uterine Carcinosarcoma (MMMT, Heterologous Type) | Stage IB       | 65                       | 50                 | 50                   | 0          | 0                | 50                           | 0                    | 0                          | 0                                 | Serous-like               |
| TCGA-NS-A49T                                          | Uterine Carcinosarcoma (MMMT, Heterologous Type) | Stage IIC1     | 69                       | 80                 | 20                   | 80         | 0                | 20                           | 0                    | 0                          | 0                                 | Serous-like               |
| TCGA-NS-A49U                                          | Uterine Carcinosarcoma (MMMT, Heterologous Type) | Stage IIC2     | 64                       | 70                 | 30                   | 60         | 0                | 40                           | 0                    | 0                          | 0                                 | Serous-like               |
| TCGA-NS-A49V                                          | Uterine Carcinosarcoma (MMMT, Heterologous Type) | Stage IA       | 62                       | 100                | 0                    | 20         | 0                | 70                           | 0                    | 0                          | 0                                 | Serous-like               |
| TCGA-NS-A49E                                          | Uterine Carcinosarcoma (MMMT, Heterologous Type) | Stage IIB      | 62                       | 90                 | 10                   | 0          | 0                | 70                           | 0                    | 0                          | 0                                 | Serous-like               |
| TCGA-NS-A49F                                          | Uterine Carcinosarcoma (MMMT, Heterologous Type) | Stage IB       | 69                       | 60                 | 40                   | 0          | 0                | 20                           | 0                    | 0                          | 0                                 | Serous-like               |
| TCGA-NS-A49V                                          | Uterine Carcinosarcoma (MMMT, Heterologous Type) | Stage IA       | 59                       | 80                 | 20                   | 0          | 0                | 80                           | 0                    | 0                          | 0                                 | Serous-like               |
| TCGA-NS-A49C                                          | Uterine Carcinosarcoma (MMMT, Heterologous Type) | Stage II       | 67                       | 60                 | 40                   | 0          | 0                | 70                           | 0                    | 0                          | 0                                 | Serous-like               |
| TCGA-NS-A49D                                          | Uterine Carcinosarcoma (MMMT, Heterologous Type) | Stage IIA      | 81                       | 60                 | 40                   | 20         | 20               | 60                           | 0                    | 0                          | 0                                 | Endometrioid-like         |
| TCGA-NS-A49E                                          | Uterine Carcinosarcoma (MMMT, Heterologous Type) | Stage IIC      | 84                       | 30                 | 70                   | 0          | 0                | 30                           | 0                    | 40                         | 0                                 | Serous-like               |
| TCGA-NS-A49F                                          | Uterine Carcinosarcoma (MMMT, Heterologous Type) | Stage IB       | 71                       | 70                 | 30                   | 0          | 0                | 70                           | 0                    | 0                          | 0                                 | Endometrioid-like         |
| TCGA-NS-A49G                                          | Uterine Carcinosarcoma (MMMT, Heterologous Type) | Stage IIB      | 77                       | 60                 | 40                   | 30         | 0                | 70                           | 0                    | 0                          | 0                                 | Serous-like               |
| TCGA-NS-A49H                                          | Uterine Carcinosarcoma (MMMT, Heterologous Type) | Stage IIC      | 69                       | N/A                | N/A                  | 0          | 30               | 0                            | 0                    | 30                         | 0                                 | Endometrioid-like         |
| TCGA-NS-A49I                                          | Uterine Carcinosarcoma (MMMT, Heterologous Type) | Stage IIB      | 67                       | N/A                | N/A                  | 0          | 40               | 0                            | 0                    | 60                         | 0                                 | Serous-like               |
| TCGA-NS-A49J                                          | Uterine Carcinosarcoma (MMMT, Heterologous Type) | Stage IIB      | 72                       | 100                | N/A                  | 0          | 0                | 0                            | 0                    | 0                          | 0                                 | Serous-like               |
| TCGA-NS-A49K                                          | Uterine Carcinosarcoma (MMMT, Heterologous Type) | Stage IA       | 67                       | N/A                | N/A                  | 0          | 0                | 0                            | 0                    | 0                          | 0                                 | Serous-like               |
| TCGA-NS-A49L                                          | Uterine Carcinosarcoma (MMMT, Heterologous Type) | Stage IA       | 71                       | 60                 | 40                   | 25         | 10               | 70                           | 0                    | 0                          | 0                                 | Endometrioid-like         |
| TCGA-NS-A49M                                          | Uterine Carcinosarcoma (MMMT, Heterologous Type) | Stage IA       | 62                       | 50                 | 50                   | 30         | 0                | 70                           | 0                    | 0                          | 0                                 | Serous-like               |
| TCGA-NS-A49N                                          | Uterine Carcinosarcoma (MMMT, Heterologous Type) | Stage IB       | 73                       | 60                 | 40                   | 0          | 0                | 60                           | 0                    | 0                          | 0                                 | Serous-like               |
| TCGA-NS-A49P                                          | Uterine Carcinosarcoma (MMMT, Heterologous Type) | Stage IIC1     | 68                       | 100                | N/A                  | 15         | 0                | 80                           | 0                    | 0                          | 0                                 | Serous-like               |
| TCGA-NS-A49Q                                          | Uterine Carcinosarcoma (MMMT, Heterologous Type) | Stage IB       | 69                       | 30                 | 70                   | 0          | 0                | 70                           | 0                    | 0                          | 0                                 | Serous-like               |
| TCGA-NS-A49R                                          | Uterine Carcinosarcoma (MMMT, Heterologous Type) | Stage IIC2     | 88                       | N/A                | N/A                  | 15         | 0                | 85                           | 0                    | 0                          | 0                                 | Serous-like               |
| TCGA-NS-A49S                                          | Uterine Carcinosarcoma (MMMT, Heterologous Type) | Stage IIC2     | 76                       | 100                | N/A                  | 10         | 0                | 88                           | 0                    | 0                          | 0                                 | Serous-like               |
| TCGA-NS-A49T                                          | Uterine Carcinosarcoma (MMMT, Heterologous Type) | Stage IB       | 75                       | 60                 | 40                   | 60         | 0                | 40                           | 0                    | 10                         | 0                                 | Serous-like               |
| TCGA-NS-A49U                                          | Uterine Carcinosarcoma (MMMT, Heterologous Type) | Stage IIC2     | 77                       | 40                 | 60                   | 0          | 0                | 70                           | 0                    | 0                          | 0                                 | Serous-like               |
| TCGA-NS-A49V                                          | Uterine Carcinosarcoma (MMMT, Heterologous Type) | Stage II       | 70                       | N/A                | N/A                  | 0          | 0                | 60                           | 0                    | 10                         | 0                                 | Serous-like               |
| TCGA-NS-A49W                                          | Uterine Carcinosarcoma (MMMT, Heterologous Type) | Stage IA       | 65                       | 60                 | 40                   | 0          | 0                | 60                           | 0                    | 0                          | 0                                 | Serous-like               |
| TCGA-NS-A49X                                          | Uterine Carcinosarcoma (MMMT, Heterologous Type) | Stage IIC      | 61                       | 80                 | 20                   | 0          | 0                | 10                           | 0                    | 0                          | 85                                | Serous-like               |
| TCGA-NS-A49Y                                          | Uterine Carcinosarcoma (MMMT, Heterologous Type) | Stage IA       | 69                       | 30                 | 70                   | 0          | 0                | 0                            | 0                    | 0                          | 0                                 | Serous-like               |
| TCGA-NS-A49Z                                          | Uterine Carcinosarcoma (MMMT, Heterologous Type) | Stage IA       | 68                       | 30                 | 70                   | 30         | 0                | 70                           | 0                    | 0                          | 0                                 | Serous-like               |
| TCGA-NS-A49A                                          | Uterine Carcinosarcoma (MMMT, Heterologous Type) | Stage IIB      | 72                       | 80                 | 20                   | 0          | 0                | 80                           | 0                    | 0                          | 0                                 | Serous-like               |
| TCGA-NS-A49B                                          | Uterine Carcinosarcoma (MMMT, Heterologous Type) | Stage IA       | 61                       | 100                | 0                    | 0          | 0                | 0                            | 0                    | 0                          | 90                                | Serous-like               |
| TCGA-NS-A49C                                          | Uterine Carcinosarcoma (MMMT, Heterologous Type) | Stage IIB      | 69                       | 100                | 0                    | 20         | 0                | 80                           | 0                    | 0                          | 0                                 | Serous-like               |
| TCGA-NS-A49D                                          | Uterine Carcinosarcoma (MMMT, Heterologous Type) | Stage IIB      | 62                       | 70                 | 30                   | 0          | 0                | 70                           | 0                    | 0                          | 0                                 | Endometrioid-like         |
| TCGA-NS-A49E                                          | Uterine Carcinosarcoma (MMMT, Heterologous Type) | Stage IIB      | 69                       | 70                 | 30                   | 0          | 0                | 70                           | 0                    | 0                          | 0                                 | Endometrioid-like         |
| TCGA-NS-A49F                                          | Uterine Carcinosarcoma (MMMT, Heterologous Type) | Stage IIC1     | 75                       | 0                  | 0                    | 20         | 0                | 80                           | 10                   | 0                          | 0                                 | Endometrioid-like         |
| TCGA-NS-A49G                                          | Uterine Carcinosarcoma (MMMT, Heterologous Type) | Stage IIB      | 60                       | 70                 | 30                   | 0          | 0                | 80                           | 10                   | 0                          | 0                                 | Serous-like               |
| TCGA-NS-A49H                                          | Uterine Carcinosarcoma (MMMT, Heterologous Type) | Stage IIC      | 67                       | 70                 | 30                   | 45         | 0                | 60                           | 0                    | 0                          | 0                                 | Endometrioid-like         |
| TCGA-NS-A49I                                          | Uterine Carcinosarcoma (MMMT, Heterologous Type) | Stage IC       | 80                       | 0                  | 10                   | 20         | 0                | 20                           | 0                    | 20                         | 0                                 | None                      |
| TCGA-NS-A49J                                          | Uterine Carcinosarcoma (MMMT, Heterologous Type) | Stage IB       | 83                       | 0                  | 30                   | 80         | 0                | 20                           | 0                    | 0                          | 0                                 | None                      |
| TCGA-NS-A49K                                          | Uterine Carcinosarcoma (MMMT, Heterologous Type) | Stage IIA      | 77                       | 100                | 0                    | 1          | 0                | 99                           | 0                    | 0                          | 0                                 | Serous-like               |
| TCGA-NS-A49L                                          | Uterine Carcinosarcoma (MMMT, Heterologous Type) | Stage IA       | 59                       | 0                  | 100                  | 0          | 0                | 0                            | 0                    | 0                          | 0                                 | Serous-like               |
| TCGA-NS-A49M                                          | Uterine Carcinosarcoma (MMMT, Heterologous Type) | Stage IV       | 61                       | 50                 | 50                   | 70         | 0                | 30                           | 0                    | 0                          | 0                                 | Serous-like               |
| TCGA-NS-A49N                                          | Uterine Carcinosarcoma (MMMT, Heterologous Type) | Stage II       | 59                       | 50                 | 0                    | 0          | 0                | 30                           | 0                    | 0                          | 0                                 | Endometrioid-like         |
| TCGA-NS-A49O                                          | Uterine Carcinosarcoma (MMMT, Heterologous Type) | Stage IIC2     | 60                       | 90                 | 10                   | 20         | 0                | 60                           | 20                   | 0                          | 0                                 | Endometrioid-like         |
| TCGA-NS-A49P                                          | Uterine Carcinosarcoma (MMMT, Heterologous Type) | Stage IIB      | 63                       | 100                | 0                    | 30         | 0                | 60                           | 0                    | 0                          | 10                                | Serous-like               |
| TCGA-NS-A49Q                                          | Uterine Carcinosarcoma (MMMT, Heterologous Type) | Stage IC       | 74                       | 0                  | 0                    | 60         | 0                | 40                           | 0                    | 0                          | 0                                 | Endometrioid-like         |
| TCGA-NS-A49R                                          | Uterine Carcinosarcoma (MMMT, Heterologous Type) | Stage IA       | 67                       | 0                  | 0                    | 40         | 0                | 60                           | 0                    | 0                          | 0                                 | Endometrioid-like         |
| TCGA-NS-A49S                                          | Uterine Carcinosarcoma (MMMT, Heterologous Type) | Stage IB       | 55                       | 100                | 0                    | 0          | 0                | 90                           | 0                    | 0                          | 0                                 | Serous-like               |

| METAPLASTIC BREAST CANCERS: TWO THREE MICRODISSECTED COMPONENTS: WHOLE EXOME SEQUENCING |           |                   |              |                   |                          |       |
|-----------------------------------------------------------------------------------------|-----------|-------------------|--------------|-------------------|--------------------------|-------|
| Case ID                                                                                 | Component | Component subtype | ER/PR/HER2** | Histologic Grade* | Age at diagnosis (years) | Stage |
| MP01                                                                                    | MP01-1    | Ductal            | -/-/-        | 3                 | 50                       | IC    |
| MP01                                                                                    | MP01-2    | Ductal            | -/-/-        | 3                 | 51                       | II    |
| MP07                                                                                    | MP07-1    | Spindle           | -/-/-        | 3                 | 51                       | II    |
| MP08                                                                                    | MP08-1    | Spindle           | -/-/-        | 3                 | 54                       | II    |
| MP08                                                                                    | MP08-2    | Ductal            | -/-/-        | 3                 | 54                       | II    |
| MP11                                                                                    | MP11-A1   | Squamous          | -/-/-        | 3                 | 37                       | II    |
| MP11                                                                                    | MP11-A2   | Spindle           | -/-/-        | 3                 | 37                       | II    |
| MP11                                                                                    | MP11-B1   | Chondroid         | -/-/-        | 3                 | 37                       | II    |
| MP15                                                                                    | MP15-1    | Chondroid         | -/-/-        | 3                 | 63                       | II    |
| MP15                                                                                    | MP15-2    | Ductal            | -/-/-        | 3                 | 63                       | II    |
| MP17                                                                                    | MP17-A1   | Spindle           | -/-/-        | 3                 | 66                       | III   |
| MP17                                                                                    | MP17-A2   | Spindle           | -/-/-        | 3                 | 66                       | III   |
| MP18                                                                                    | MP18-1    | Squamous          | -/-/-        | 3                 | 39                       | IC    |
| MP18                                                                                    | MP18-2    | Ductal            | -/-/-        | 3                 | 39                       | IC    |
| MP19                                                                                    | MP19-1    | Chondroid         | -/-/-        | 3                 | 52                       | IC    |
| MP19                                                                                    | MP19-2    | Ductal            | -/-/-        | 3                 | 52                       | IC    |
| MP21                                                                                    | MP21-R0   | Spindle           | -/-/-        | 3                 | 37                       | II    |
| MP21                                                                                    | MP21-R2   | Ductal            | -/-/-        | 3                 | 37                       | II    |
| MP27                                                                                    | MP27-1    | Chondroid         | -/-/-        | 3                 | 57                       | IC    |
| MP27                                                                                    | MP27-2    | Ductal            | -/-/-        | 3                 | 57                       | IC    |
| MP27                                                                                    | MP27-3    | Ductal            | -/-/-        | 3                 | 57                       | IC    |
| MP27                                                                                    | MP27-4    | Ductal            | -/-/-        | 3                 | 52                       | II    |

| UTERINE CARCINOSARCOMAS: TWO MICRODISSECTED COMPONENTS: WHOLE EXOME SEQUENCING |           |                   |                  |                          |       |
|--------------------------------------------------------------------------------|-----------|-------------------|------------------|--------------------------|-------|
| Case                                                                           | Component | Component subtype | Histology        | Age at diagnosis (years) | Stage |
| C51                                                                            | C51-C     | Carcinoma         | (chondrosarcoma) | 84                       | IB    |
| C51                                                                            | C51-S     | Carcinoma         | (chondrosarcoma) | 84                       | IB    |
| C53                                                                            | C53-S     | Carcinoma         | Heterologous     | 68                       | IA    |
| C54                                                                            | C54-C     | Carcinoma         | Heterologous     | 75                       | IIA   |
| C58                                                                            | C58-C     | Carcinoma         | Heterologous     | 88                       | IIIC  |
| C58                                                                            | C58-S     | Carcinoma         | Heterologous     | 79                       | IIIC  |
| C58                                                                            | C58-C     | Sarcoma           | Heterologous     | 82                       | IIIC  |
| C58                                                                            | C58-S     | Sarcoma           | Heterologous     | 82                       | IIIC  |

\* ER, estrogen receptor expression; PR, progesterone receptor expression; HER2, overexpression/amplification according to the Nottingham grading system







































**Supplementary Table S3. DAVID pathway analysis in 35 metaplastic breast cancers from Ng et al (Clin Cancer Res 2017) and 55 non-hypermethylated uterine carcinosarcomas from Cherniack et al (TCGA, 2017).**

| DAVID pathway analysis in metaplastic breast carcinomas |                                                                                      |                             |                            |           |  |
|---------------------------------------------------------|--------------------------------------------------------------------------------------|-----------------------------|----------------------------|-----------|--|
| Database gene set ID                                    | Description Term                                                                     | Number of genes in gene set | Number of genes in overlap | P value   |  |
| KEGG_PATHWAY_hsa05200                                   | Pathways in cancer                                                                   | 393                         | 45                         | 3.34E-21  |  |
| KEGG_PATHWAY_hsa05202                                   | Transcriptional misregulation in cancer                                              | 168                         | 27                         | 5.12E-16  |  |
| KEGG_PATHWAY_hsa04116                                   | p53 signaling pathway                                                                | 87                          | 14                         | 9.32E-10  |  |
| KEGG_PATHWAY_hsa04181                                   | Cell cycle                                                                           | 124                         | 17                         | 5.34E-09  |  |
| KEGG_PATHWAY_hsa02030                                   | PI3K-Akt signaling pathway                                                           | 345                         | 27                         | 1.62E-08  |  |
| KEGG_PATHWAY_hsa04012                                   | Central carbon metabolism in cancer                                                  | 64                          | 11                         | 7.44E-07  |  |
| KEGG_PATHWAY_hsa04068                                   | ERB signaling pathway                                                                | 87                          | 12                         | 1.62E-06  |  |
| KEGG_PATHWAY_hsa04008                                   | FoxO signaling pathway                                                               | 134                         | 14                         | 4.52E-06  |  |
| KEGG_PATHWAY_hsa04006                                   | HP1-1 signaling pathway                                                              | 98                          | 11                         | 3.72E-05  |  |
| KEGG_PATHWAY_hsa04510                                   | Focal adhesion                                                                       | 206                         | 15                         | 1.05E-04  |  |
| KEGG_PATHWAY_hsa04550                                   | Signaling pathways regulating pluripotency of stem cells                             | 140                         | 12                         | 1.69E-04  |  |
| KEGG_PATHWAY_hsa04370                                   | Jak-STAT signaling pathway                                                           | 145                         | 11                         | 9.41E-04  |  |
| KEGG_PATHWAY_hsa04319                                   | Wnt signaling pathway                                                                | 138                         | 19                         | 0.0024965 |  |
| KEGG_PATHWAY_hsa04520                                   | Adherens junction                                                                    | 71                          | 7                          | 0.0037188 |  |
| KEGG_PATHWAY_hsa04390                                   | Hippo signaling pathway                                                              | 151                         | 10                         | 0.0045419 |  |
| KEGG_PATHWAY_hsa00310                                   | Lysine degradation                                                                   | 6                           | 2                          | 0.0045992 |  |
| KEGG_PATHWAY_hsa04015                                   | Rap1 signaling pathway                                                               | 210                         | 12                         | 0.0047454 |  |
| KEGG_PATHWAY_hsa04150                                   | mTOR signaling pathway                                                               | 58                          | 6                          | 0.0073511 |  |
| KEGG_PATHWAY_hsa04611                                   | Platelet activation                                                                  | 130                         | 8                          | 0.0186611 |  |
| KEGG_PATHWAY_hsa04014                                   | Ras signaling pathway                                                                | 228                         | 11                         | 0.0210506 |  |
| KEGG_PATHWAY_hsa04370                                   | VEGF signaling pathway                                                               | 81                          | 5                          | 0.0294807 |  |
| KEGG_PATHWAY_hsa04210                                   | Apoptosis                                                                            | 62                          | 5                          | 0.0415144 |  |
| KEGG_PATHWAY_hsa04690                                   | Natural killer cell mediated cytotoxicity                                            | 122                         | 7                          | 0.0440307 |  |
| KEGG_PATHWAY_hsa04690                                   | CTCF: First Multivalent Nuclear Factor                                               | 25                          | 12                         | 4.59E-09  |  |
| KEGG_PATHWAY_hsa04690                                   | Role of BRCA1, BRCA2 and ATM in Cancer Susceptibility                                | 8                           | 2                          | 4.65E-05  |  |
| KEGG_PATHWAY_hsa04690                                   | Cell Cycle: G1/S Check Point                                                         | 30                          | 9                          | 5.36E-05  |  |
| KEGG_PATHWAY_hsa04690                                   | Cytidine and Cell Cycle Regulation                                                   | 25                          | 8                          | 1.16E-04  |  |
| KEGG_PATHWAY_hsa04690                                   | Influence of Ras and Rho proteins on G1 to S Transition                              | 27                          | 11                         | 0.0001144 |  |
| KEGG_PATHWAY_hsa04690                                   | Cell Cycle: G2/M Checkpoint                                                          | 25                          | 7                          | 9.21E-04  |  |
| KEGG_PATHWAY_hsa04690                                   | p53 Signaling Pathway                                                                | 17                          | 6                          | 9.34E-04  |  |
| KEGG_PATHWAY_hsa04690                                   | ATM Signaling Pathway                                                                | 21                          | 6                          | 0.0024965 |  |
| KEGG_PATHWAY_hsa04690                                   | Role of ERBB2 in Signal Transduction and Oncology                                    | 23                          | 6                          | 0.004035  |  |
| KEGG_PATHWAY_hsa04690                                   | Inhibition of Cellular Proliferation by Gleevec                                      | 23                          | 6                          | 0.004035  |  |
| KEGG_PATHWAY_hsa04690                                   | TPO Signaling Pathway                                                                | 6                           | 24                         | 0.0045992 |  |
| KEGG_PATHWAY_hsa04690                                   | Phospholipase C Signaling Pathway                                                    | 9                           | 4                          | 0.0075159 |  |
| KEGG_PATHWAY_hsa04690                                   | IL7 Signaling Transduction                                                           | 17                          | 5                          | 0.0079592 |  |
| KEGG_PATHWAY_hsa04690                                   | Growth Hormone Signaling Pathway                                                     | 27                          | 6                          | 0.0091448 |  |
| KEGG_PATHWAY_hsa04690                                   | PTEN dependent cell cycle arrest and apoptosis                                       | 18                          | 5                          | 0.0094855 |  |
| KEGG_PATHWAY_hsa04690                                   | IL2 Receptor Beta Chain in T Cell Activation                                         | 39                          | 7                          | 0.0098287 |  |
| KEGG_PATHWAY_hsa04690                                   | VEGF: Hypoxia, and Angiogenesis                                                      | 6                           | 11                         | 0.0101314 |  |
| KEGG_PATHWAY_hsa04690                                   | mTOR Signaling Pathway                                                               | 26                          | 5                          | 0.042099  |  |
| KEGG_PATHWAY_hsa04690                                   | NOTCH1 Intracellular Domain Regulates Transcription                                  | 47                          | 7                          | 1.26E-04  |  |
| KEGG_PATHWAY_hsa04690                                   | Constitutive Signaling by NOTCH1 PEST Domain Mutants                                 | 57                          | 7                          | 3.72E-04  |  |
| KEGG_PATHWAY_hsa04690                                   | Constitutive Signaling by NOTCH1 HD+PEST Domain Mutants                              | 57                          | 7                          | 3.72E-04  |  |
| KEGG_PATHWAY_hsa04690                                   | PI3K events in ERBB2 signaling                                                       | 16                          | 5                          | 1.21E-04  |  |
| KEGG_PATHWAY_hsa04690                                   | Activation of anterior HOX genes in hindbrain development during early embryogenesis | 122                         | 12                         | 8.58E-05  |  |
| KEGG_PATHWAY_hsa04690                                   | PI3K activates Akt signaling                                                         | 81                          | 8                          | 4.13E-04  |  |
| KEGG_PATHWAY_hsa04690                                   | Constitutive Signaling by Aberrant PI3K in Cancer                                    | 61                          | 7                          | 5.38E-04  |  |
| KEGG_PATHWAY_hsa04690                                   | Deactivation of the beta-catenin transactivating complex                             | 42                          | 6                          | 0.008144  |  |
| KEGG_PATHWAY_hsa04690                                   | RAF/MEK kinase cascade                                                               | 116                         | 9                          | 7.42E-04  |  |
| KEGG_PATHWAY_hsa04690                                   | Transcriptional regulation of white adipocyte differentiation                        | 19                          | 7                          | 0.0021621 |  |
| KEGG_PATHWAY_hsa04690                                   | Resolution of Disjunct Synaptic Junction Intermediates                               | 13                          | 5                          | 0.0021621 |  |
| KEGG_PATHWAY_hsa04690                                   | GPVI-mediated activation cascade                                                     | 56                          | 6                          | 0.0024394 |  |
| KEGG_PATHWAY_hsa04690                                   | RMTs methylate histone arginines                                                     | 77                          | 6                          | 0.0092177 |  |
| KEGG_PATHWAY_hsa04690                                   | Signaling by GPCR in disease                                                         | 27                          | 4                          | 0.0101314 |  |
| KEGG_PATHWAY_hsa04690                                   | Synthesis of PIPs at the plasma membrane                                             | 35                          | 4                          | 0.0207352 |  |
| KEGG_PATHWAY_hsa04690                                   | AXIN misassembles mutants destabilize the destruction complex                        | 14                          | 3                          | 0.0225016 |  |
| KEGG_PATHWAY_hsa04690                                   | Truncations of AMER1 destabilize the destruction complex                             | 14                          | 3                          | 0.0225016 |  |
| KEGG_PATHWAY_hsa04690                                   | SUMOylation of transcription factors                                                 | 17                          | 3                          | 0.0324509 |  |
| KEGG_PATHWAY_hsa04690                                   | Constitutive Signaling by Ligand-Responsive EGFR Cancer Variants                     | 19                          | 3                          | 0.0403312 |  |
| KEGG_PATHWAY_hsa04690                                   | Factors involved in mesoplasia development and patient production                    | 112                         | 3                          | 0.0403312 |  |
| KEGG_PATHWAY_hsa04690                                   | Pre-NOTCH Transcription and Translation                                              | 29                          | 6                          | 1.09E-04  |  |
| KEGG_PATHWAY_hsa04690                                   | Notch-4/5 transcription pathway                                                      | 12                          | 3                          | 0.0168823 |  |

  

| DAVID pathway analysis in uterine carcinosarcomas |                                                                                      |                             |                            |           |  |
|---------------------------------------------------|--------------------------------------------------------------------------------------|-----------------------------|----------------------------|-----------|--|
| Database gene set ID                              | Description Term                                                                     | Number of genes in gene set | Number of genes in overlap | P value   |  |
| KEGG_PATHWAY_hsa05200                             | Pathways in cancer                                                                   | 393                         | 49                         | 5.34E-20  |  |
| KEGG_PATHWAY_hsa05202                             | Transcriptional misregulation in cancer                                              | 168                         | 27                         | 3.16E-21  |  |
| KEGG_PATHWAY_hsa02030                             | Central carbon metabolism in cancer                                                  | 64                          | 16                         | 7.47E-11  |  |
| KEGG_PATHWAY_hsa04012                             | Signaling pathways regulating pluripotency of stem cells                             | 140                         | 20                         | 1.40E-09  |  |
| KEGG_PATHWAY_hsa04012                             | ERB signaling pathway                                                                | 87                          | 16                         | 7.19E-09  |  |
| KEGG_PATHWAY_hsa04151                             | PI3K-Akt signaling pathway                                                           | 345                         | 27                         | 1.35E-06  |  |
| KEGG_PATHWAY_hsa02030                             | Central carbon metabolism in cancer                                                  | 64                          | 16                         | 7.47E-11  |  |
| KEGG_PATHWAY_hsa04012                             | ERB signaling pathway                                                                | 87                          | 16                         | 7.19E-09  |  |
| KEGG_PATHWAY_hsa04014                             | Ras signaling pathway                                                                | 226                         | 21                         | 2.20E-06  |  |
| KEGG_PATHWAY_hsa04008                             | FoxO signaling pathway                                                               | 134                         | 16                         | 2.48E-06  |  |
| KEGG_PATHWAY_hsa04110                             | Cell cycle                                                                           | 124                         | 15                         | 4.91E-06  |  |
| KEGG_PATHWAY_hsa04006                             | HP1-1 signaling pathway                                                              | 98                          | 13                         | 1.03E-05  |  |
| KEGG_PATHWAY_hsa04510                             | Focal adhesion                                                                       | 206                         | 18                         | 3.31E-05  |  |
| KEGG_PATHWAY_hsa04690                             | Adherens junction                                                                    | 71                          | 5                          | 0.0021621 |  |
| KEGG_PATHWAY_hsa04015                             | Rap1 signaling pathway                                                               | 210                         | 17                         | 1.46E-04  |  |
| KEGG_PATHWAY_hsa04370                             | VEGF signaling pathway                                                               | 61                          | 9                          | 1.98E-04  |  |
| KEGG_PATHWAY_hsa04319                             | Wnt signaling pathway                                                                | 138                         | 19                         | 0.0024965 |  |
| KEGG_PATHWAY_hsa04682                             | B cell receptor signaling pathway                                                    | 69                          | 9                          | 4.69E-04  |  |
| KEGG_PATHWAY_hsa04690                             | Jak-STAT signaling pathway                                                           | 145                         | 13                         | 4.80E-04  |  |
| KEGG_PATHWAY_hsa04611                             | Platelet activation                                                                  | 130                         | 8                          | 5.71E-04  |  |
| KEGG_PATHWAY_hsa05231                             | Choline metabolism in cancer                                                         | 101                         | 10                         | 0.0014574 |  |
| KEGG_PATHWAY_hsa04210                             | Apoptosis                                                                            | 62                          | 7                          | 0.00602   |  |
| KEGG_PATHWAY_hsa04350                             | TGF-beta signaling pathway                                                           | 84                          | 8                          | 0.0030263 |  |
| KEGG_PATHWAY_hsa04611                             | Platelet activation                                                                  | 130                         | 10                         | 0.0079302 |  |
| KEGG_PATHWAY_hsa04116                             | p53 signaling pathway                                                                | 67                          | 7                          | 0.0097781 |  |
| KEGG_PATHWAY_hsa04062                             | Chemokine signaling pathway                                                          | 22                          | 168                        | 0.0101312 |  |
| KEGG_PATHWAY_hsa04010                             | MAPK signaling pathway                                                               | 255                         | 14                         | 0.0190157 |  |
| KEGG_PATHWAY_hsa04690                             | CTCF: First Multivalent Nuclear Factor                                               | 25                          | 10                         | 5.62E-06  |  |
| KEGG_PATHWAY_hsa04690                             | Role of ERBB2 in Signal Transduction and Oncology                                    | 9                           | 23                         | 9.21E-09  |  |
| KEGG_PATHWAY_hsa04690                             | PDGF Signaling Pathway                                                               | 28                          | 9                          | 1.29E-04  |  |
| KEGG_PATHWAY_hsa04690                             | IL7 Signaling Transduction                                                           | 17                          | 7                          | 2.65E-04  |  |
| KEGG_PATHWAY_hsa04690                             | TPO Signaling Pathway                                                                | 24                          | 8                          | 0.0021621 |  |
| KEGG_PATHWAY_hsa04690                             | Tumor Suppressor Ar Inhibits Ribosomal Biogenesis                                    | 18                          | 7                          | 3.79E-04  |  |
| KEGG_PATHWAY_hsa04690                             | EGF Signaling Pathway                                                                | 27                          | 8                          | 6.75E-04  |  |
| KEGG_PATHWAY_hsa04690                             | VEGF: Hypoxia, and Angiogenesis                                                      | 6                           | 11                         | 0.0101314 |  |
| KEGG_PATHWAY_hsa04690                             | Role of EAS in Neuronal Survival                                                     | 18                          | 6                          | 0.0030032 |  |
| KEGG_PATHWAY_hsa04690                             | Influence of Ras and Rho proteins on G1 to S Transition                              | 27                          | 7                          | 0.0030989 |  |
| KEGG_PATHWAY_hsa04690                             | Role of BRCA1, BRCA2 and ATM in Cancer Susceptibility                                | 22                          | 6                          | 0.0036163 |  |
| KEGG_PATHWAY_hsa04690                             | Ras Signaling Pathway                                                                | 23                          | 6                          | 0.0093148 |  |
| KEGG_PATHWAY_hsa04690                             | Chromatin Remodeling by hSWI/SNF ATP-dependent Complexes                             | 17                          | 5                          | 0.0150159 |  |
| KEGG_PATHWAY_hsa04690                             | p53 Signaling Pathway                                                                | 17                          | 5                          | 0.0150159 |  |
| KEGG_PATHWAY_hsa04690                             | Telomeres, Telomerase, Cellular Aging, and Immortality                               | 18                          | 5                          | 0.0184481 |  |
| KEGG_PATHWAY_hsa04690                             | Growth Hormone Signaling Pathway                                                     | 27                          | 6                          | 0.0185223 |  |
| KEGG_PATHWAY_hsa04690                             | IL2 Receptor Beta Chain in T Cell Activation                                         | 39                          | 7                          | 0.0212442 |  |
| KEGG_PATHWAY_hsa04690                             | ERK1/2 Mapk Signaling pathway                                                        | 30                          | 6                          | 0.0284197 |  |
| KEGG_PATHWAY_hsa04690                             | ATM Signaling Pathway                                                                | 21                          | 5                          | 0.0314884 |  |
| KEGG_PATHWAY_hsa04690                             | Downstream signal transduction                                                       | 29                          | 9                          | 1.57E-07  |  |
| KEGG_PATHWAY_hsa04690                             | NOTCH1 Intracellular Domain Regulates Transcription                                  | 47                          | 9                          | 3.82E-06  |  |
| KEGG_PATHWAY_hsa04690                             | Constitutive Signaling by NOTCH1 HD+PEST Domain Mutants                              | 57                          | 9                          | 3.52E-05  |  |
| KEGG_PATHWAY_hsa04690                             | Constitutive Signaling by NOTCH1 PEST Domain Mutants                                 | 57                          | 9                          | 3.52E-05  |  |
| KEGG_PATHWAY_hsa04690                             | PI3K activates Akt signaling                                                         | 81                          | 10                         | 0.0030263 |  |
| KEGG_PATHWAY_hsa04690                             | Activation of anterior HOX genes in hindbrain development during early embryogenesis | 122                         | 12                         | 8.58E-05  |  |
| KEGG_PATHWAY_hsa04690                             | Deactivation of the beta-catenin transactivating complex                             | 42                          | 6                          | 3.72E-04  |  |
| KEGG_PATHWAY_hsa04690                             | PI3K events in ERBB2 signaling                                                       | 16                          | 5                          | 1.21E-04  |  |
| KEGG_PATHWAY_hsa04690                             | SHC1 events in ERBB2 signaling                                                       | 19                          | 5                          | 7.24E-04  |  |
| KEGG_PATHWAY_hsa04690                             | PI3K activation                                                                      | 61                          | 9                          | 0.0021621 |  |
| KEGG_PATHWAY_hsa04690                             | VEGFR3 mediated cell proliferation                                                   | 21                          | 5                          | 0.0010791 |  |
| KEGG_PATHWAY_hsa04690                             | RAF/MEK kinase cascade                                                               | 116                         | 10                         | 0.0011349 |  |
| KEGG_PATHWAY_hsa04690                             | Signaling by SCF: K11                                                                | 37                          | 6                          | 0.0012979 |  |
| KEGG_PATHWAY_hsa04690                             | Downregulation of SMAD2/3-SMAD4 transcriptional activity                             | 23                          | 5                          | 0.0022269 |  |
| KEGG_PATHWAY_hsa04690                             | Homologous DNA Pairing and Strand Exchange                                           | 15                          | 5                          | 0.0022269 |  |
| KEGG_PATHWAY_hsa04690                             | Downregulation of ERBB2-ERBB3 signaling                                              | 23                          | 4                          | 0.0022727 |  |
| KEGG_PATHWAY_hsa04690                             | RMTs methylate histone lysines                                                       | 64                          | 7                          | 0.0022727 |  |
| KEGG_PATHWAY_hsa04690                             | Transcriptional regulation of pluripotent stem cells                                 | 28                          | 5                          | 0.0022660 |  |
| KEGG_PATHWAY_hsa04690                             | Cyclin E associated events during G1/S transition                                    | 14                          | 4                          | 0.003346  |  |
| KEGG_PATHWAY_hsa04690                             | Formation of the beta-catenin/TCF transactivating complex                            | 88                          | 6                          | 0.003346  |  |
| KEGG_PATHWAY_hsa04690                             | Pre-NOTCH Transcription and Translation                                              | 29                          | 6                          | 0.0037238 |  |
| KEGG_PATHWAY_hsa04690                             | GRB1 events in ERBB2 signaling                                                       | 5                           | 3                          | 0.0047627 |  |
| KEGG_PATHWAY_hsa04690                             | Formation of Serine/Threonine Associated Helicostromatin Foci (SAHF)                 | 16                          | 4                          | 0.0048903 |  |
| KEGG_PATHWAY_hsa04690                             | GRB2 events in ERBB2 signaling                                                       | 16                          | 4                          | 0.0048903 |  |
| KEGG_PATHWAY_hsa04690                             | Regulation of gene expression by hypoxia-inducible factor                            | 10                          | 3                          | 0.0190989 |  |
| KEGG_PATHWAY_hsa04690                             | Signaling to RAS                                                                     | 10                          | 3                          | 0.0190989 |  |
| KEGG_PATHWAY_hsa04690                             | Signaling by Jun                                                                     | 11                          | 3                          | 0.023979  |  |
| KEGG_PATHWAY_hsa04690                             | Formation of annular gap junctions                                                   | 11                          | 3                          | 0.023979  |  |
| KEGG_PATHWAY_hsa04690                             | Gap junction degradation                                                             | 12                          | 3                          | 0.0284197 |  |
| KEGG_PATHWAY_hsa04690                             | SUMOylation of DNA damage response and repair proteins                               | 77                          | 6                          | 0.0287762 |  |
| KEGG_PATHWAY_hsa04690                             | RNA Polymerase II transcription elongation                                           | 54                          | 5                          | 0.0322269 |  |
| KEGG_PATHWAY_hsa04690                             | mRNAP events                                                                         | 13                          | 3                          | 0.0322269 |  |
| KEGG_PATHWAY_hsa04690                             | AKT phosphatases targets in the cytosol                                              | 13                          | 3                          | 0.0322269 |  |
| KEGG_PATHWAY_hsa04690                             | Notch-4/5 transcription pathway                                                      | 13                          | 3                          | 0.0322269 |  |
| KEGG_PATHWAY_hsa04690                             | APC truncation mutants have impaired AXIN binding                                    | 14                          | 3                          | 0.0379733 |  |
| KEGG_PATHWAY_hsa04690                             | Truncations of AMER1 destabilize the destruction complex                             | 14                          | 3                          | 0.0379733 |  |
| KEGG_PATHWAY_hsa04690                             | AXIN misassembles mutants destabilize the destruction complex                        | 14                          | 3                          | 0.0379733 |  |
| KEGG_PATHWAY_hsa04690                             | SHC1 events in ERBB4 signaling                                                       | 4                           | 3                          | 0.0379733 |  |
| KEGG_PATHWAY_hsa04690                             | SHC2 DNA damage checkpoint                                                           | 84                          | 6                          | 0.0397302 |  |

**Supplementary Table S4.** Genetic alterations affecting homologous recombination genes in metaplastic breast carcinomas and uterine carcinosarcomas.

| Sample name | Gene   | Mutation   | Effect            | Chromosome | Position  | Reference allele | Alternate allele | Sequencing depth at position | Loss of heterozygosity | Clinvar    | Mutation status | Somatic homozygous deletion |
|-------------|--------|------------|-------------------|------------|-----------|------------------|------------------|------------------------------|------------------------|------------|-----------------|-----------------------------|
| META33      | BRCA1  | Q74*       | Nonsense mutation | 17         | 41256966  | G                | A                | 57                           | TRUE                   | Pathogenic | Germline        | -                           |
| META39      | BRCA2  | Y3225fs    | Frame_Shift_Ins   | 13         | 32972321  | T                | TA               | 156                          | -                      | Pathogenic | Germline        | -                           |
| META39      | RBBP8  | R100W      | Missense mutation | 18         | 20548818  | C                | T                | 67                           | TRUE                   | Pathogenic | Germline        | -                           |
| META52      | RAD54B | S240A      | Missense mutation | 8          | 95419730  | A                | C                | 135                          | -                      | -          | Somatic         | -                           |
| MP1         | BRCA2  | S1982fs    | Frame_Shift_Del   | 13         | 32914437  | GT               | G                | 173                          | -                      | Pathogenic | Germline        | -                           |
| MP1         | BRCA2  | E2226Sfs*6 | Frame_Shift_Del   | 13         | 32915166  | CAG              | C                | 507                          | -                      | Pathogenic | Somatic         | -                           |
| MP11        | EME1   | S411T      | Missense_Mutation | 17         | 48456548  | G                | C                | 769                          | TRUE                   | -          | Somatic         | -                           |
| MP11        | BRCA1  | G1777fs    | Frame_Shift_Ins   | 17         | 41209079  | T                | TG               | 169                          | TRUE                   | Pathogenic | Germline        | -                           |
| MP15        | BRIP1  | A349P      | Missense mutation | 17         | 59878709  | C                | G                | 183                          | -                      | Pathogenic | Germline        | -                           |
| MP19        | BRCA1  | L639*      | Nonsense mutation | 17         | 41245632  | A                | T                | 126                          | TRUE                   | Pathogenic | Germline        | -                           |
| MP21        | BRCA1  | G1800Fs    | Frame_Shift_Del   | 17         | 41201208  | TG               | T                | 84                           | TRUE                   | Pathogenic | Germline        | -                           |
| MP27        | SLX4   | A1358G     | Missense mutation | 16         | 3639566   | G                | C                | 212                          | -                      | -          | Somatic         | -                           |
| MP27        | POLQ   | T948fs     | Frame_Shift_Del   | 3          | 121208934 | AT               | A                | 68                           | -                      | -          | Germline        | -                           |
| MP8         | BRCA1  | Q23fs      | Frame_Shift_Del   | 17         | 41276044  | ACT              | A                | 71                           | TRUE                   | Pathogenic | Germline        | -                           |
| MTC04       | EME1   | N233K      | Missense mutation | 17         | 48453268  | T                | A                | 713                          | TRUE                   | -          | Somatic         | -                           |
| MTC06       | BRCA1  | E1346Fs    | Frame_Shift_Del   | 17         | 41243512  | CT               | C                | 111                          | TRUE                   | Pathogenic | Germline        | -                           |
| MTC14       | BRIP1  | D674G      | Missense mutation | 17         | 59853838  | T                | C                | 386                          | TRUE                   | -          | Somatic         | -                           |
| MP15        | BRCA2  | -          | -                 | 13         | -         | -                | -                | -                            | -                      | -          | -               | 13q13.1                     |
| UCS11       | WRN    | -          | -                 | 8          | -         | -                | -                | -                            | -                      | -          | -               | 8p12                        |
| UCS11       | USP11  | -          | -                 | X          | -         | -                | -                | -                            | -                      | -          | -               | Xp11.23                     |
| UCS12       | FANCA  | -          | -                 | 16         | -         | -                | -                | -                            | -                      | -          | -               | 16q24.3                     |

**Supplementary Table S5.** Number of shared and unique mutations, mutational signatures and clonal relatedness index of the histologically distinct components of 11 metaplastic breast cancers and 6 uterine carcinosarcomas subjected to whole-exome sequencing.

| Case ID | Shared non-synonymous somatic mutations carcinoma and mesenchymal components (n) | Shared non-synonymous somatic mutations between mesenchymal components (n) | Carcinoma unique non-synonymous somatic mutations (n) | Mesenchymal unique non-synonymous somatic mutations (n) | Mutational signature (dominant/secondary) | SigMA (dominant/secondary) | Clonal relatedness index |
|---------|----------------------------------------------------------------------------------|----------------------------------------------------------------------------|-------------------------------------------------------|---------------------------------------------------------|-------------------------------------------|----------------------------|--------------------------|
| MP1-1   | 131                                                                              | N/A                                                                        | 14                                                    | 18                                                      | NP                                        | Aging/APOBEC               | 66                       |
| MP1-2   |                                                                                  |                                                                            |                                                       |                                                         | NP                                        | APOBEC/HRD                 | 66                       |
| MP7-1   | 54                                                                               | N/A                                                                        | 18                                                    | 9                                                       | NP                                        | Aging/HRD                  | 48                       |
| MP7-2   |                                                                                  |                                                                            |                                                       |                                                         | NP                                        | Aging/HRD                  | 48                       |
| MP8-1   | 78                                                                               | N/A                                                                        | 42                                                    | 44                                                      | 3 (HRD)/Sig. 22                           | HRD/Aging                  | 66                       |
| MP8-2   |                                                                                  |                                                                            |                                                       |                                                         | 3 (HRD)/13 (APOBEC)                       | HRD/Aging                  | 66                       |
| MP11-A1 | 62                                                                               | 54                                                                         | N/A                                                   | 17                                                      | NP                                        | HRD/Aging                  | 66                       |
| MP11-A2 |                                                                                  |                                                                            |                                                       | 41                                                      | 3 (HRD)/13 (APOBEC)                       | HRD/Aging                  | 66                       |
| MP11-B  |                                                                                  |                                                                            |                                                       | 185                                                     | N/A                                       | 3 (HRD)/26 (MSI)           | HRD/Aging                |
| MP15-1  | 87                                                                               | N/A                                                                        | 46                                                    | 16                                                      | NP                                        | HRD/Aging                  | 66                       |
| MP15-2  |                                                                                  |                                                                            |                                                       |                                                         | 3 (HRD)/7 (UV)                            | HRD/Aging                  | 66                       |
| MP17-A1 | 17                                                                               | 20                                                                         | N/A                                                   | 4                                                       | NP                                        | NP                         | 19/25                    |
| MP17-A2 |                                                                                  |                                                                            |                                                       | 3                                                       | NP                                        | NP                         | 19/25                    |
| MP17-B1 |                                                                                  |                                                                            |                                                       | 2                                                       | N/A                                       | NP                         | NP                       |
| MP18-1  | 29                                                                               | N/A                                                                        | 35                                                    | 62                                                      | 3 (HRD)/1 (Aging)                         | HRD/Aging                  | 66                       |
| MP18-2  |                                                                                  |                                                                            |                                                       |                                                         | 3 (HRD)/13 (APOBEC)                       | HRD/Aging                  | 66                       |
| MP19-1  | 109                                                                              | N/A                                                                        | 17                                                    | 38                                                      | NP                                        | HRD/Aging                  | 66                       |
| MP19-2  |                                                                                  |                                                                            |                                                       |                                                         | 3 (HRD)/Sig. 24                           | HRD/Aging                  | 66                       |
| MP21-R1 | 36                                                                               | 18                                                                         | N/A                                                   | 31                                                      | 3 (HRD)/Sig. 11                           | HRD/Aging                  | 66                       |
| MP21-R2 |                                                                                  |                                                                            |                                                       | 2                                                       | NP                                        | NP                         | 66                       |
| MP21-2  |                                                                                  |                                                                            |                                                       | 4                                                       | N/A                                       | NP                         | NP                       |
| MP27-1  | 54                                                                               | N/A                                                                        | 47                                                    | 48                                                      | 3 (HRD)/1 (Aging)                         | HRD/Aging                  | 66                       |
| MP27-3  |                                                                                  |                                                                            |                                                       |                                                         | 1 (Aging)/3 (HRD)                         | HRD/Aging                  | 66                       |
| MP35-1  | 48                                                                               | N/A                                                                        | 19                                                    | 18                                                      | NP                                        | Aging/HRD                  | 33                       |
| MP35-2  |                                                                                  |                                                                            |                                                       |                                                         | NP                                        | Aging/HRD                  | 33                       |
| CS1-C   | 81                                                                               | N/A                                                                        | 1047                                                  | 865                                                     | 6 (MSI)/15 (MSI)                          | MSI/Aging                  | 57                       |
| CS1-S   |                                                                                  |                                                                            |                                                       |                                                         | 6 (MSI)/15 (MSI)                          | MSI/Aging                  | 57                       |
| CS3-C   | 67                                                                               | N/A                                                                        | 3                                                     | 6                                                       | NP                                        | NP                         | 47                       |
| CS3-S   |                                                                                  |                                                                            |                                                       |                                                         | NP                                        | Aging/HRD                  | 47                       |
| CS4-C   | 51                                                                               | N/A                                                                        | 19                                                    | 41                                                      | 1 (Aging)/7 (UV)                          | Aging                      | 30                       |
| CS4-S   |                                                                                  |                                                                            |                                                       |                                                         | 3 (HRD)/1 (Aging)                         | Aging                      | 30                       |
| CS5-C   | 50                                                                               | N/A                                                                        | 4                                                     | 1                                                       | NP                                        | NP                         | 30                       |
| CS5-S   |                                                                                  |                                                                            |                                                       |                                                         | NP                                        | NP                         | 30                       |
| CS6-C   | 25                                                                               | N/A                                                                        | 19                                                    | 17                                                      | NP                                        | APOBEC/HRD                 | 18                       |
| CS6-S   |                                                                                  |                                                                            |                                                       |                                                         | NP                                        | Aging/HRD                  | 18                       |
| CS8-C   | 67                                                                               | N/A                                                                        | 21                                                    | 20                                                      | 3 (HRD)/1 (Aging)                         | APOBEC/HRD                 | 57                       |
| CS8-S   |                                                                                  |                                                                            |                                                       |                                                         | 8 (HRD)/Sig. 29                           | Aging/HRD                  | 57                       |

N/A, not applicable; NP, not performed (mutational signatures using DeconstructSigs could only be defined in samples  $\geq 20$  single nucleotide variants (SNVs); SigMA signatures could only be defined for samples  $\geq 5$  SNVs).
